# Supplementary material
Source: Springer Nature journal article supplement (https://www.springermedizin.de/resource/supplementary/12889_2011_3804_MOESM2_ESM.pdf/9492694)

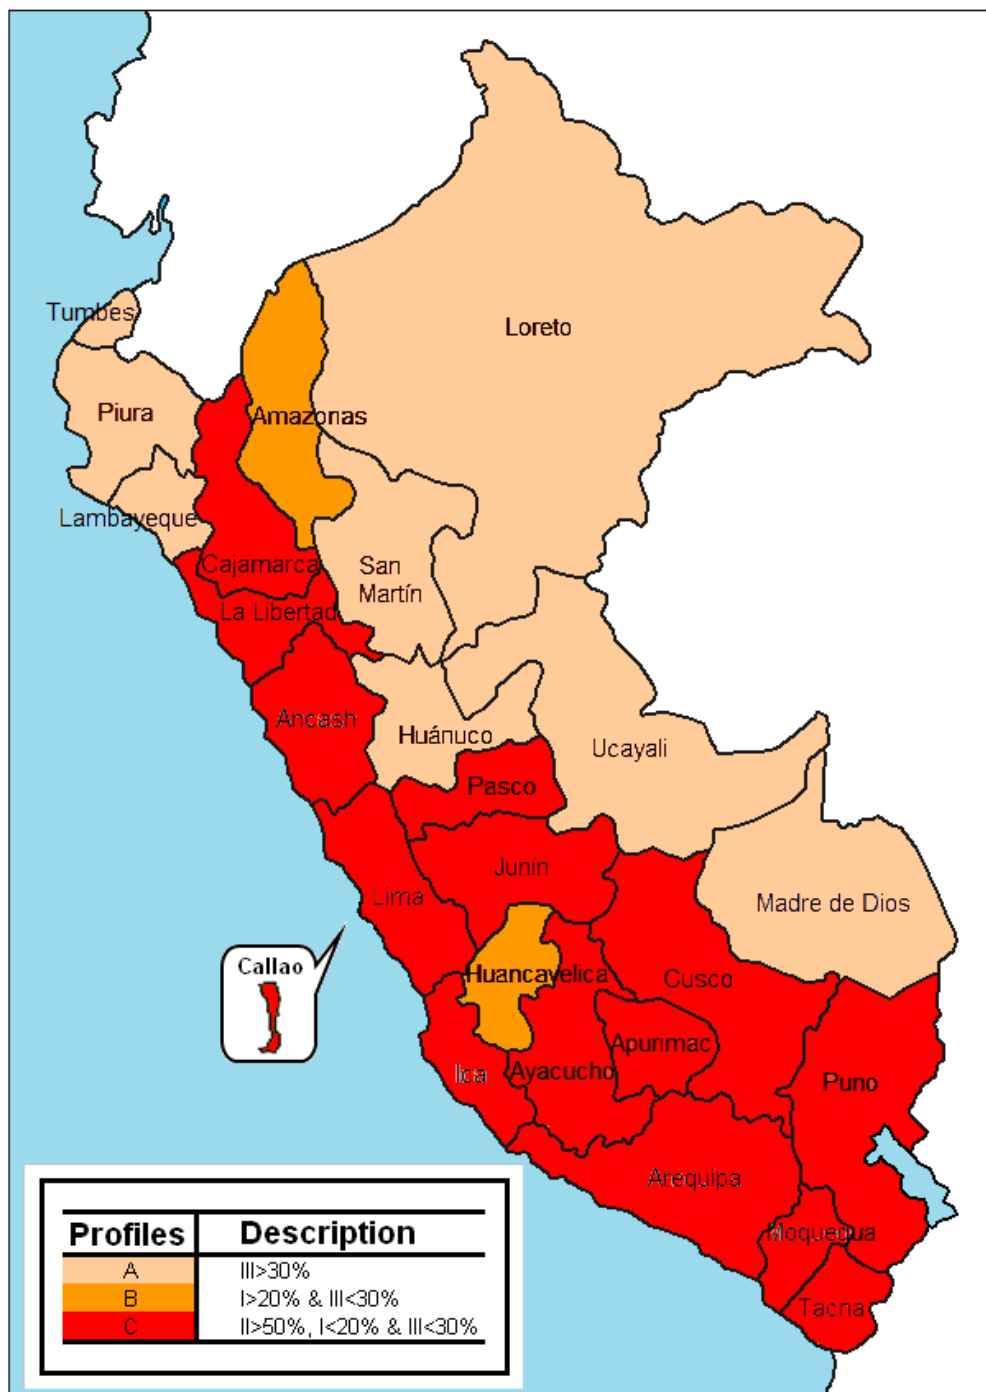

| Profiles | Description                   |
|----------|-------------------------------|
| A        | III > 30%                     |
| B        | I > 20% & III < 30%           |
| C        | II > 50%, I < 20% & III < 30% |

Supplement: MOESM2 [file 9492694]
